# Supplementary material for: Defining cutaneous molecular pathobiology of arsenicals using phenylarsine oxide as a prototype
Source: Sci Rep. 2016 Oct 11;6:34865. doi: 10.1038/srep34865 (PMC5057142; doi:10.1038/srep34865)
Supplement: Supplementary Information [file srep34865-s1.pdf]

## **Supplementary figures and tables file**

### **Defining cutaneous molecular pathobiology of arsenicals using phenylarsine oxide as a prototype**

Ritesh K Srivastava<sup>1\*</sup>, Changzhao Li<sup>1\*</sup>, Zhiping Weng<sup>1</sup>, Anupam Agarwal<sup>2</sup>, Craig A. Elmet<sup>1</sup>, Farrukh Afaq<sup>1</sup>, Mohammad Athar<sup>1#</sup>

<sup>a</sup>Department of Dermatology and Skin Diseases Research Center, University of Alabama at Birmingham, Alabama, USA.

<sup>b</sup>Division of Nephrology, Department of Medicine, School of Medicine, University of Alabama at Birmingham, Alabama, USA.

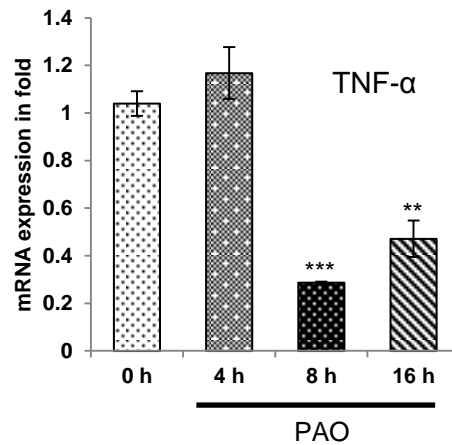

**Supplementary Fig. S1:** Real time PCR analysis of TNF- $\alpha$  in the skin of mouse either treated with vehicle or PAO (100  $\mu$ g/mouse). Data are expressed as Mean  $\pm$  SEM. \*\* $P < 0.01$  and \*\*\* $P < 0.001$  indicate significant change when compared to control (0 h).

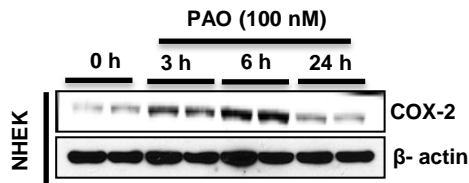

**Supplementary Fig. S2:** Time-dependent western blot analysis of COX-2 in the cell lysate of either PBS-treated or PAO-treated NHEK.  $\beta$ -actin was used as a loading control.

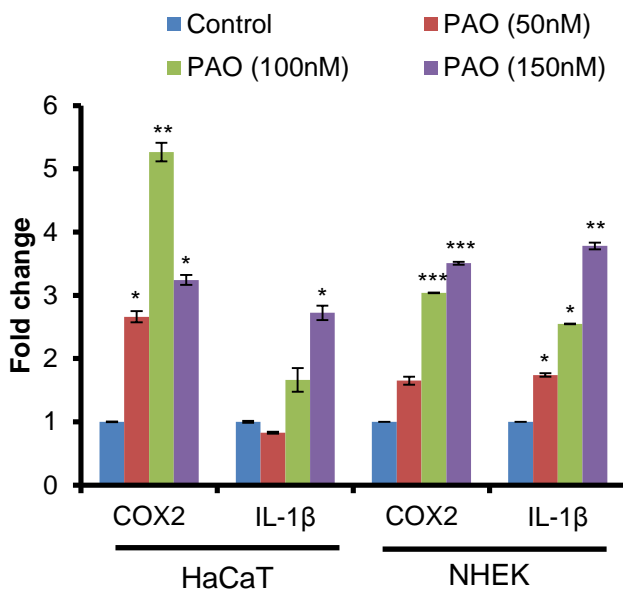

**Supplementary Fig. S3:** Densitometric analysis of western blots for fig. 5C.  $\beta$ -actin was used as a loading control. \* $p < 0.05$ , \*\* $P < 0.01$ , \*\*\* $P < 0.001$  when compared to their respective controls.

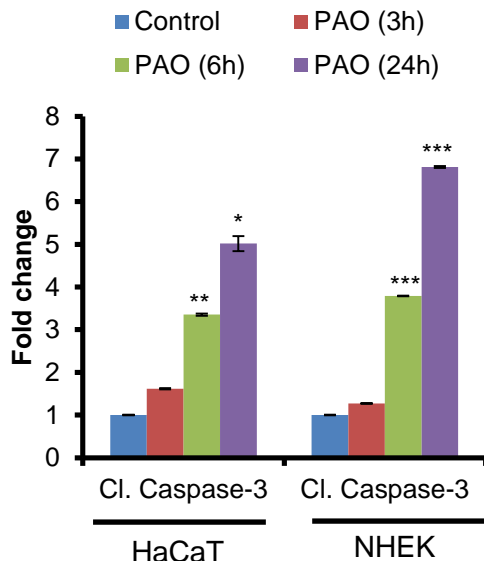

**Supplementary Fig. S4:** Dentiometric analysis of western blots for fig. 5E-II.  $\beta$ -actin was used as a loading control. \* $p$ <0.05, \*\* $P$ <0.01, \*\*\* $P$ <0.001 when compared to their respective controls.

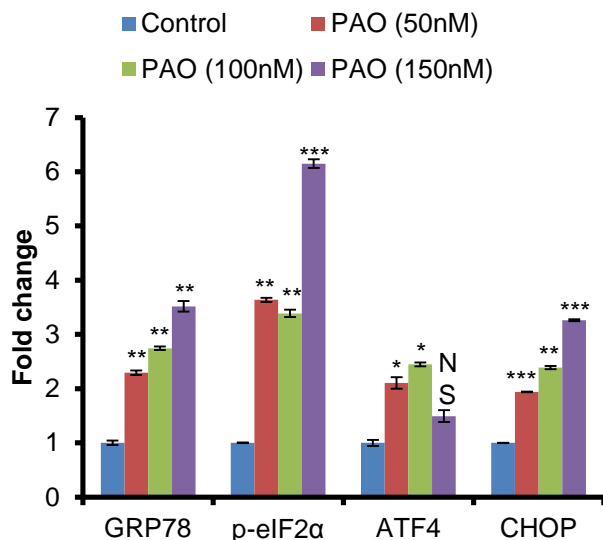

**Supplementary Fig. S5:** Dentiometric analysis of western blots for fig. 6A & 6B.  $\beta$ -actin was used as a loading control. \* $p$ <0.05, \*\* $P$ <0.01, \*\*\* $P$ <0.001 when compared to their respective controls. NS- Non significant

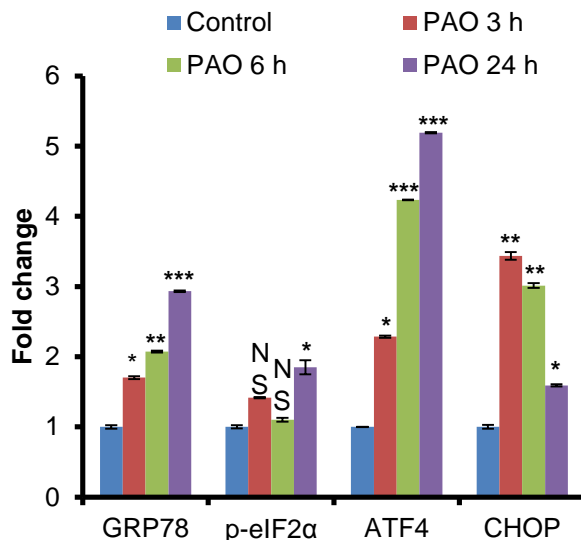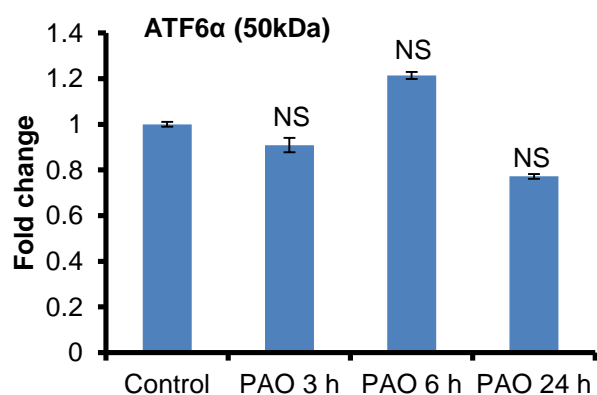

**Supplementary Fig. S6:** Dentiometric analysis of western blots for fig. 6F.  $\beta$ -actin was used as a loading control. NS- Non significant.

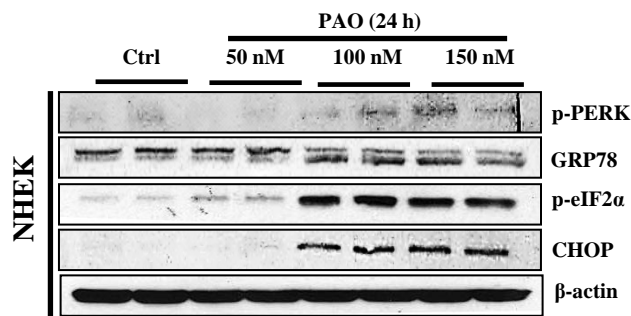

**Supplementary Fig. S7:** Dose-dependent western blot analysis of p-PERK, GRP78, p-eIF2α and CHOP in the cell lysate of either PBS-treated (control) or PAO-treated (50-150 nM, 24 h) NHEK. β-actin was used as a loading control.

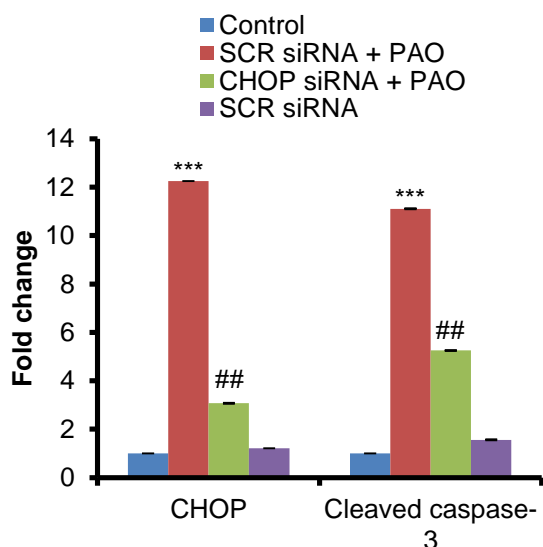

**Supplementary Fig. S8:** Densiometric analysis of western blots for fig. 7C & 7D. β-actin was used as a loading control. \*\*\*P<0.001 when compared to control. ##P<0.01 when compared to SCR siRNA + PAO-treated group.

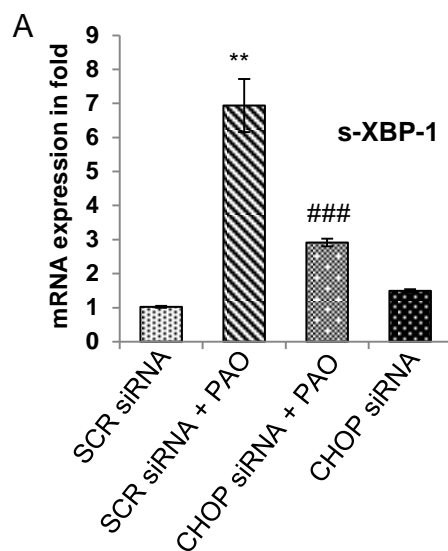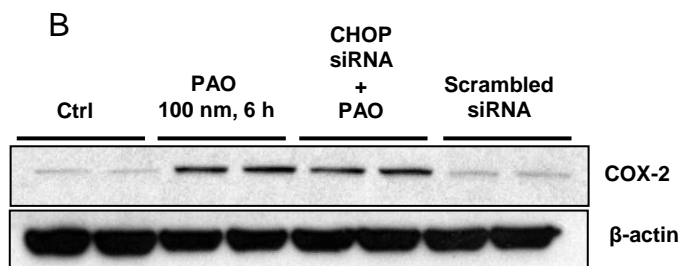

**Supplementary Fig. S9:** (A) Real time PCR analysis of sXBP-1 in CHOP knockdown HaCaT cells treated either with vehicle or PAO. (B) Western blot analysis of COX-2 in CHOP knockdown HaCaT cells treated either with vehicle or PAO. Scrambled siRNA was used as a negative control.

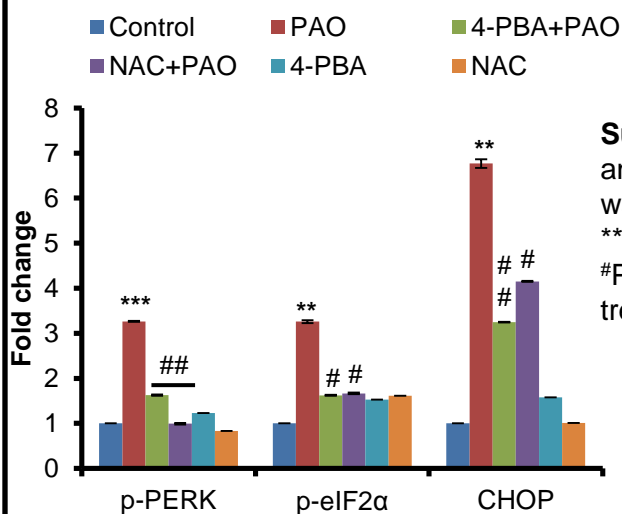

**Supplementary Fig. S10:** Dentiometric analysis of western blots for fig. 8D. β-actin was used as a loading control. \*\*P<0.01, \*\*\*P<0.001 when compared to control. #P<0.05, ##P<0.01 when compared to PAO-treated group.

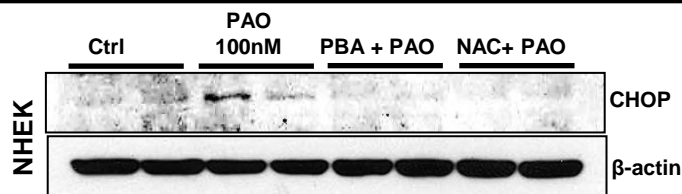

**Supplementary Fig. S11:** Western blot analysis of CHOP in NHEK cells treated with PAO in the presence or absence of 4-PBA or NAC.

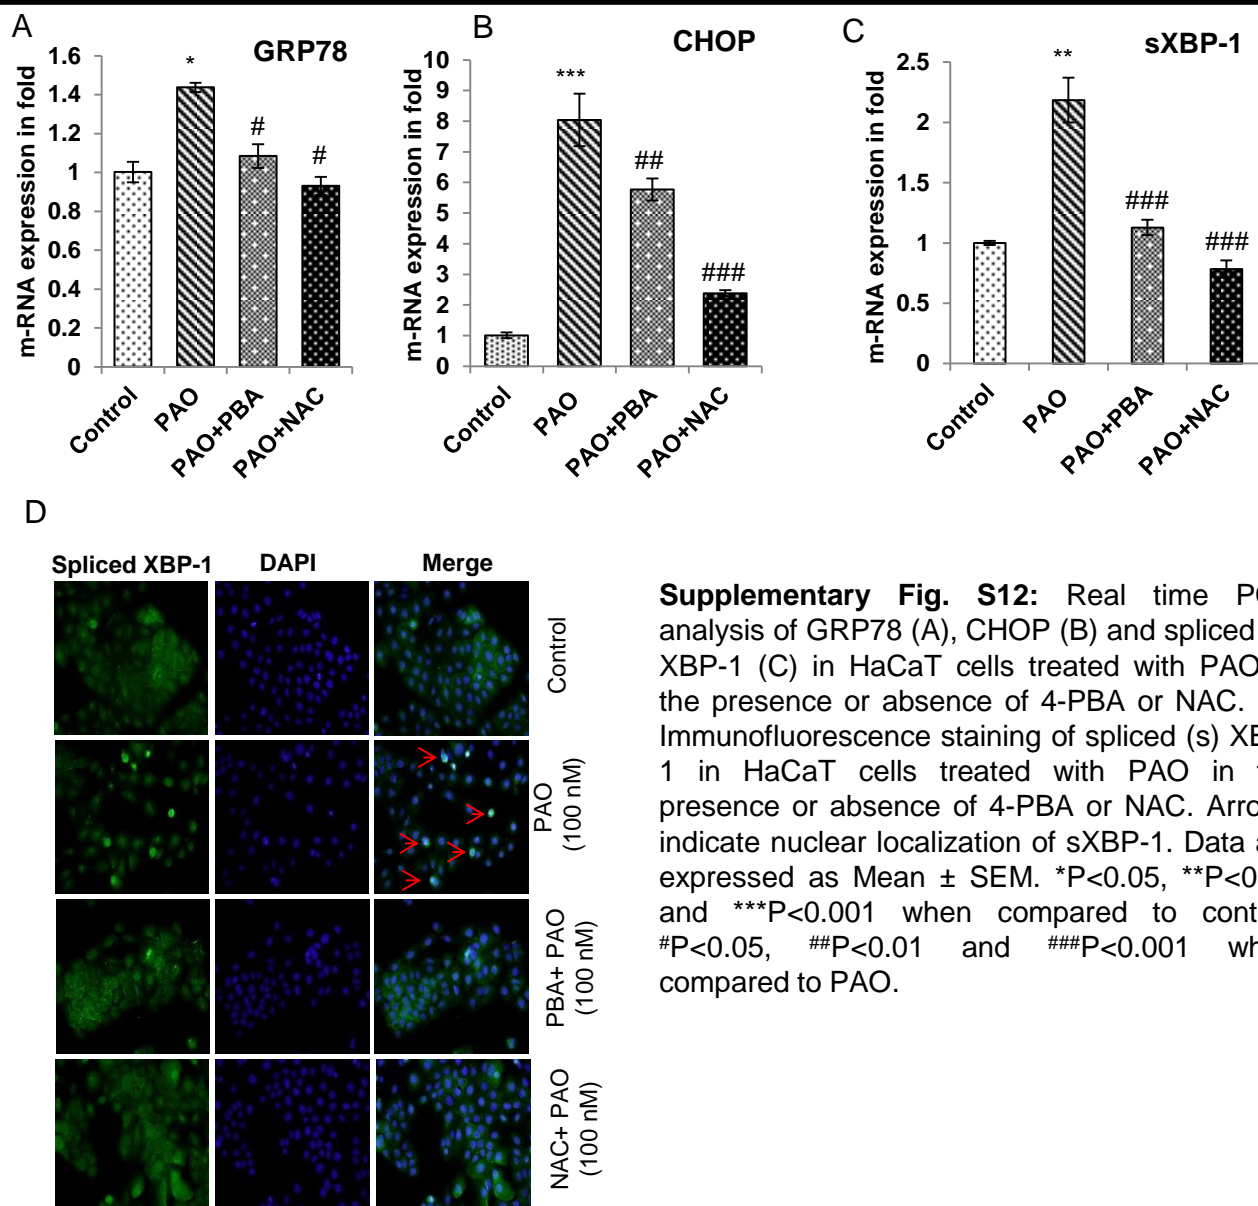

**Supplementary Fig. S12:** Real time PCR analysis of GRP78 (A), CHOP (B) and spliced (s) XBP-1 (C) in HaCaT cells treated with PAO in the presence or absence of 4-PBA or NAC. (D) Immunofluorescence staining of spliced (s) XBP-1 in HaCaT cells treated with PAO in the presence or absence of 4-PBA or NAC. Arrows indicate nuclear localization of sXBP-1. Data are expressed as Mean  $\pm$  SEM. \* $P < 0.05$ , \*\* $P < 0.01$  and \*\*\* $P < 0.001$  when compared to control. # $P < 0.05$ , ## $P < 0.01$  and ### $P < 0.001$  when compared to PAO.

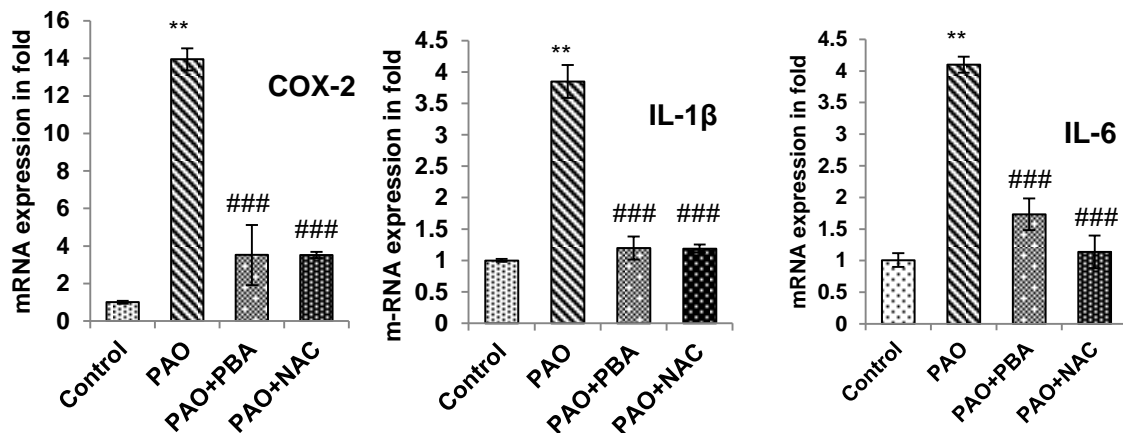

**Supplementary Fig. S13:** Real time PCR analysis of COX-2, IL-1 $\beta$  and IL-6 in HaCaT cells. \*\*P<0.01 when compared to control. ###P<0.001 when compared to PAO.

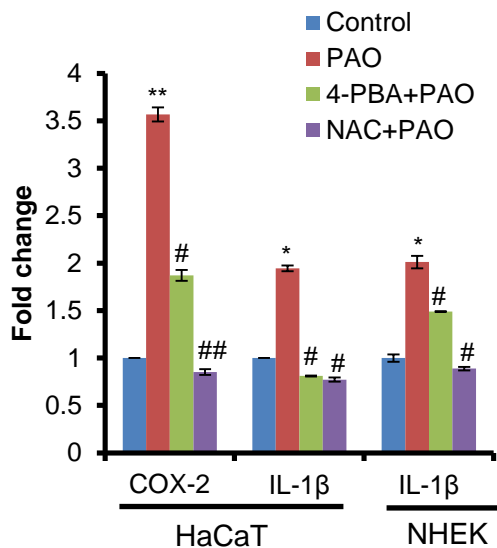

**Supplementary Fig. S14:** Densitometric analysis of western blots for fig. 8E.  $\beta$ -actin was used as a loading control. \*P<0.05, \*\*P<0.01 when compared to control. #P<0.05, ##P<0.01 when compared to PAO-treated group.

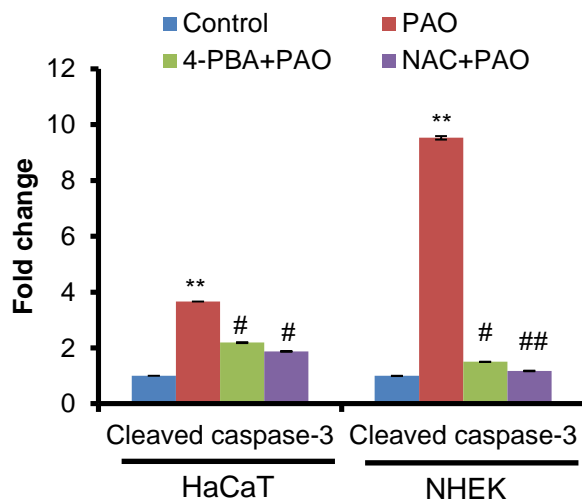

**Supplementary Fig. S15:** Densitometric analysis of western blots for fig. 8F.  $\beta$ -actin was used as a loading control. \*\*P<0.01 when compared to control. #P<0.05, ##P<0.01 when compared to PAO-treated group.

**Supplementary Table- S1:** PAO-induced skin changes in terms of clinical observation, erythema and edema.

| <b>Draize Score</b> | <b>PAO-induced clinical observations</b>                                                                 |
|---------------------|----------------------------------------------------------------------------------------------------------|
| 0                   | Unchanged from age matched control site                                                                  |
| 1                   | Mild edema, mild erythema, or other mild changes from age matched control mice (no necrosis)             |
| 2                   | Moderate edema, moderate erythema, or other moderate changes from age matched control mice (no necrosis) |
| 3                   | Severe edema, Severe erythema, or other Severe changes from age matched control mice (no necrosis)       |
| 4                   | Focal necrosis: focal area of tissue is necrotic                                                         |
| 5                   | Mild necrosis: 25-50% of tissue is necrotic                                                              |
| 6                   | Moderate necrosis: 50-75% of tissue is necrotic                                                          |
| 7                   | Severe necrosis: 75-100% of tissue is necrotic                                                           |

**Supplementary Table- S2:** List of primers used in this study.

| <b>Real Time Primers (mouse)</b>  | <b>Sequences</b>                          |
|-----------------------------------|-------------------------------------------|
| IL-1 $\beta$                      | F 5`-AAAGCCTCGTGCTGTCCGACC-3`             |
|                                   | R 5`-CAGGGTGGGTGTGCCGTCTT-3`              |
| IL-6                              | F 5`-GGTGACAACCACGGCCTTCCC-3`             |
|                                   | R 5`-AAGCCTCCGACTTGTGAAGTGGT-3`           |
| IFN- $\alpha$                     | F 5`-CCCCTGACCCAGGAAGATGCC-3`             |
|                                   | R 5`-ACATTGGCAGAGGAAGACAGGGCTC-3`         |
| TNF- $\alpha$                     | F 5`-AGCCCACGTCGTAGCAAACCAC-3`            |
|                                   | R 5`-TCGGGGCAGCCTTGTCCCTT-3`              |
| GAPDH                             | F 5'-CAATGTGTCCGTCGTGGATCT-3'             |
|                                   | R 5'-GTCCTCAGTGTAGCCCAAGATG-3'            |
| <b>Real Time Primers (human)</b>  | <b>Sequences</b>                          |
| Grp78                             | F 5`-GCCTGTGGCTGGACTGCCTG-3`              |
|                                   | F-5`-ACGCCGACGCAGGAGTAGGT-3`              |
| Chop                              | F-5`-GGTGGCAGCGACAGAGCCAA-3`              |
|                                   | F-5`-CAGCTGCCATCTCTGCAGTTGGA-3`           |
| sXBP-1                            | F-5`-GGTCTGCTGAGTCCGCAGCAGG-3`            |
|                                   | F-5`-GGGCTTGGTATATATGTGG-3`               |
| GAPDH                             | F-5`-GGGGCTGGCATTGCCCTCAA-3`              |
|                                   | F-5`-GGCAGGGACTCCCCAGCAGT-3`              |
| <b>TaqMan PCR Primers (human)</b> | <b>Cat. No. (ThermoFisher Scientific)</b> |
| COX-2                             | Hs00153133-m1                             |
| IL-6                              | Hs00985639-m1                             |
| IL-1 $\beta$                      | Hs00174097_m1                             |
| TGF- $\beta$                      | Hs00998133-m1                             |
| GAPDH                             | Hs02758991-g1                             |

**Supplementary Table- S3:** List of primary antibodies used in this study.

\*IF- Immunofluorescence; \*\*IHC- immunohistochemically

| Antibody          | Company                   | Application        | Dilution |
|-------------------|---------------------------|--------------------|----------|
| IL-1 $\beta$      | Abcam                     | Western blot       | 1000     |
| COX-2             | Cayman Chemicals          | Western blot       | 1000     |
| GRP78             | Cell signaling/Santa Cruz | Western Blot/*IF   | 1000/200 |
| p-PERK            | Cell signaling            | Western Blot       | 800      |
| CHOP              | Cell signaling            | Western Blot/**IHC | 1000/100 |
| ATF6 $\alpha$     | Santa Cruz                | Western Blot       | 1000     |
| p-elf2 $\alpha$   | Cell signaling            | Western Blot       | 1000     |
| ATF4              | Abcam/Cell signaling      | Western Blot/**IHC | 1000/100 |
| Cleaved caspase-3 | Cell signaling            | Western Blot       | 1000     |
